# Supplementary material for: RNY (YRNA)-derived small RNAs regulate cell death and inflammation in monocytes/macrophages
Source: PubMed Central journal article supplement (PMC5386355; doi:10.1038/cddis.2016.429), 2017-01-05

**a****Mouse Macrophages**

Northern blot

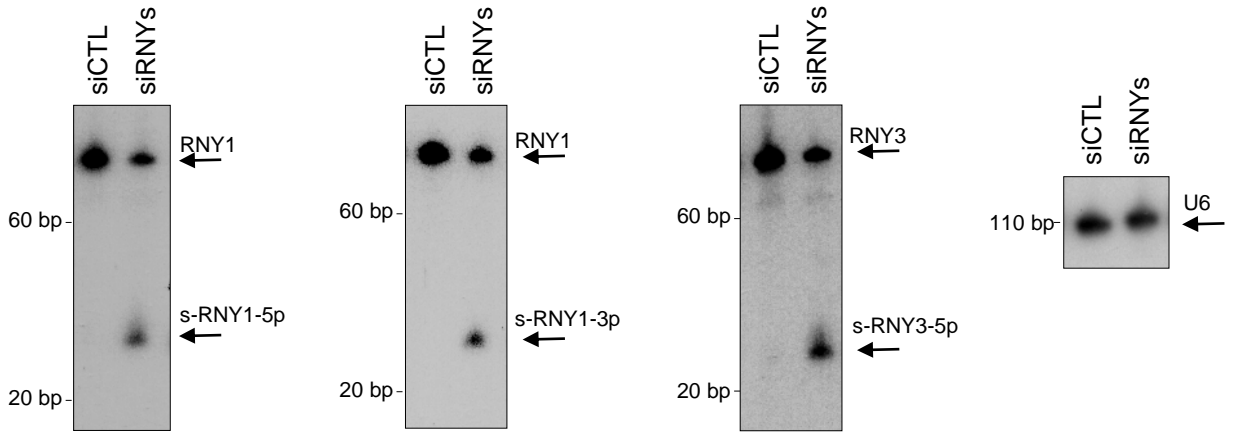**b****Mouse Macrophages**

Northern blot

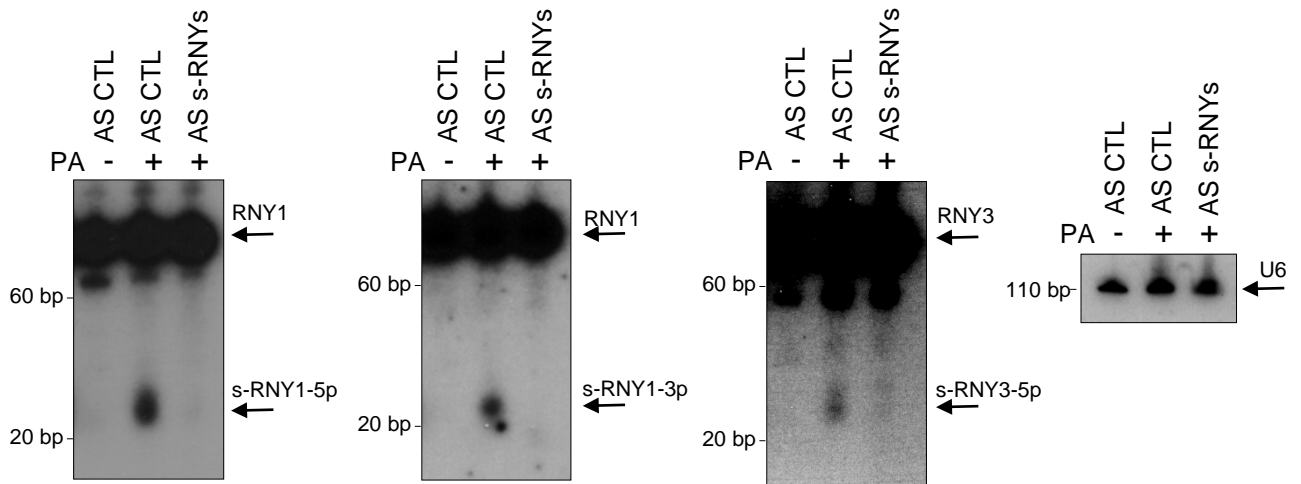**c****Human Monocytes**

Northern blot

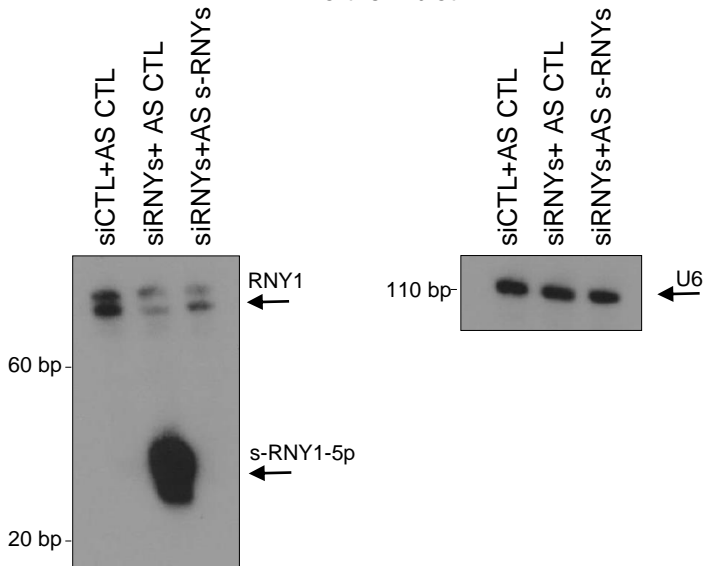

Supplement: cddis2016429x2.pdf [file cddis2016429x2.pdf]
