# Supplementary material for: RNY (YRNA)-derived small RNAs regulate cell death and inflammation in monocytes/macrophages
Source: PubMed Central journal article supplement (PMC5386355; doi:10.1038/cddis.2016.429), 2017-01-05

**a**

Flow Cytometry  
Human Monocytes

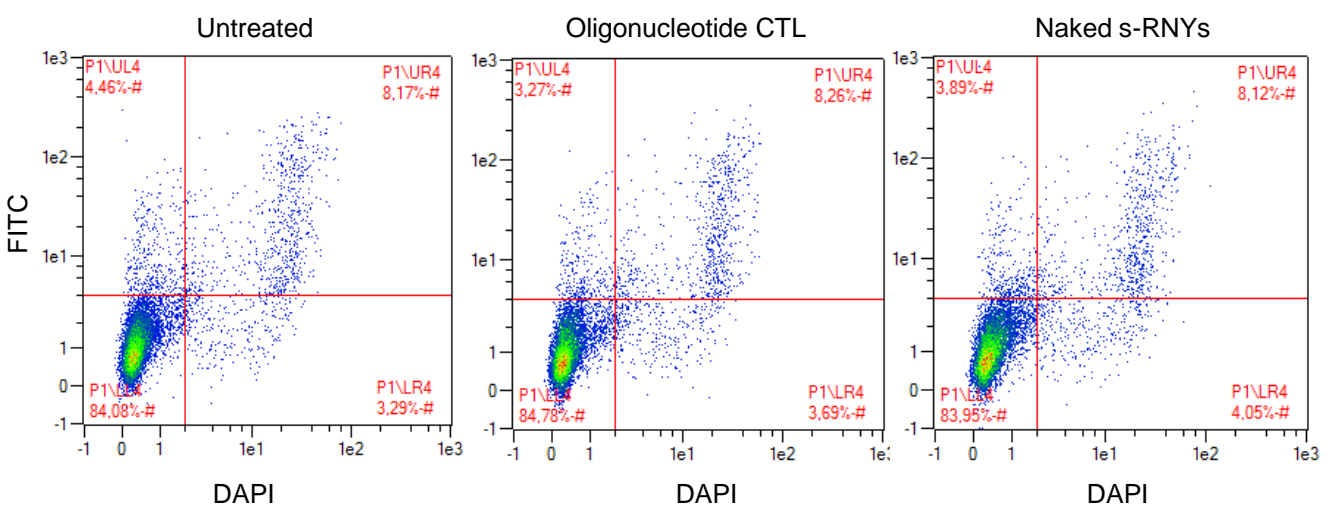**b**

Mouse Macrophages

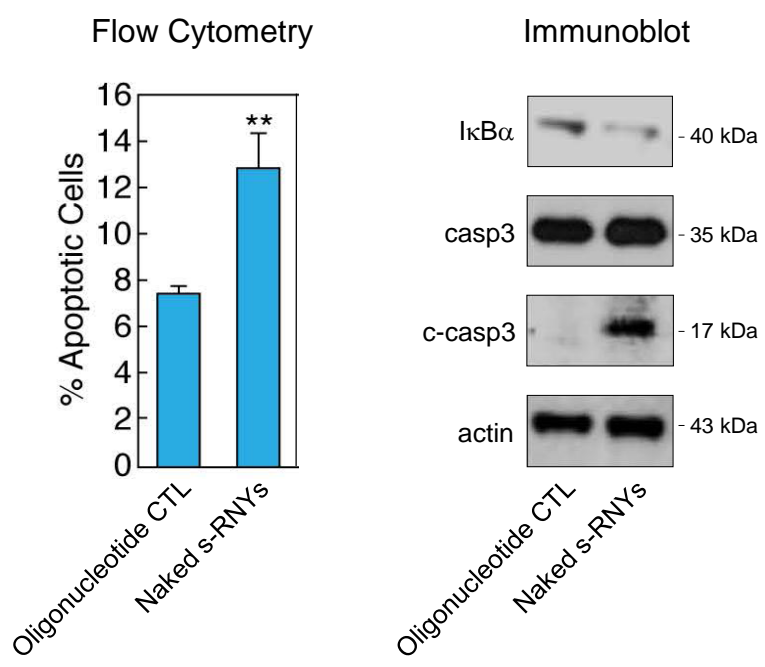

Supplement: cddis2016429x5.pdf [file cddis2016429x5.pdf]
